# Supplementary material for: Single-layer metal halides MX2 (X = Cl, Br, I): stability and tunable magnetism from first principles and Monte Carlo simulations
Source: Royal Society of Chemistry journal article supplement (doi:10.1039/c7tc02664a), 2017-01-01
Supplement: c7tc02664a1.pdf [file c7tc02664a1.pdf]

# **Single-layer metal halides $\text{MX}_2$ (X = Cl, Br, I): stability and tunable magnetism from first principles and Monte Carlo simulation**

*Vadym V. Kulish<sup>1</sup>, Wei Huang<sup>2</sup>*

<sup>1</sup> Department of Mechanical Engineering, National University of Singapore, 21 Lower Kent Ridge Rd, 119077, Singapore

<sup>2</sup> Institute of Systems Science, National University of Singapore, 25 Heng Mui Keng Terrace, 119615, Singapore

E-mails: kulishvadym@gmail.com (V.V.K), huangwei860921@gmail.com (W.H)

**Electronic supplementary information**

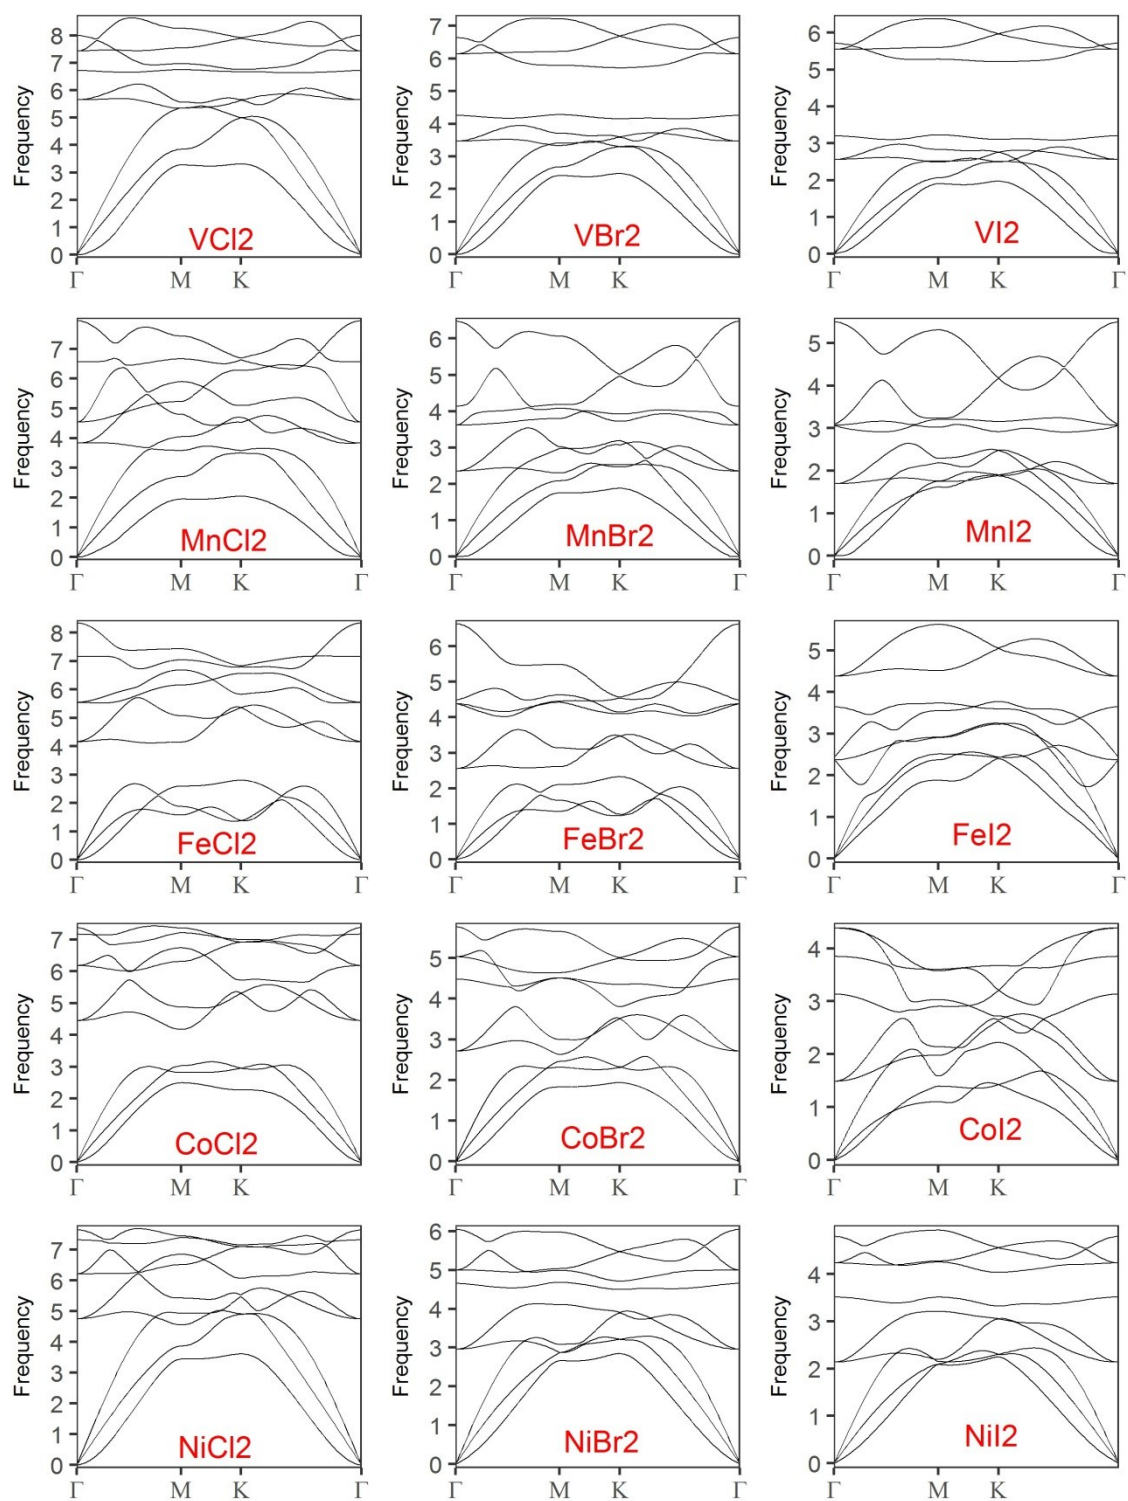

**Figure S1.** Calculated phonon dispersions of single-layer dihalides

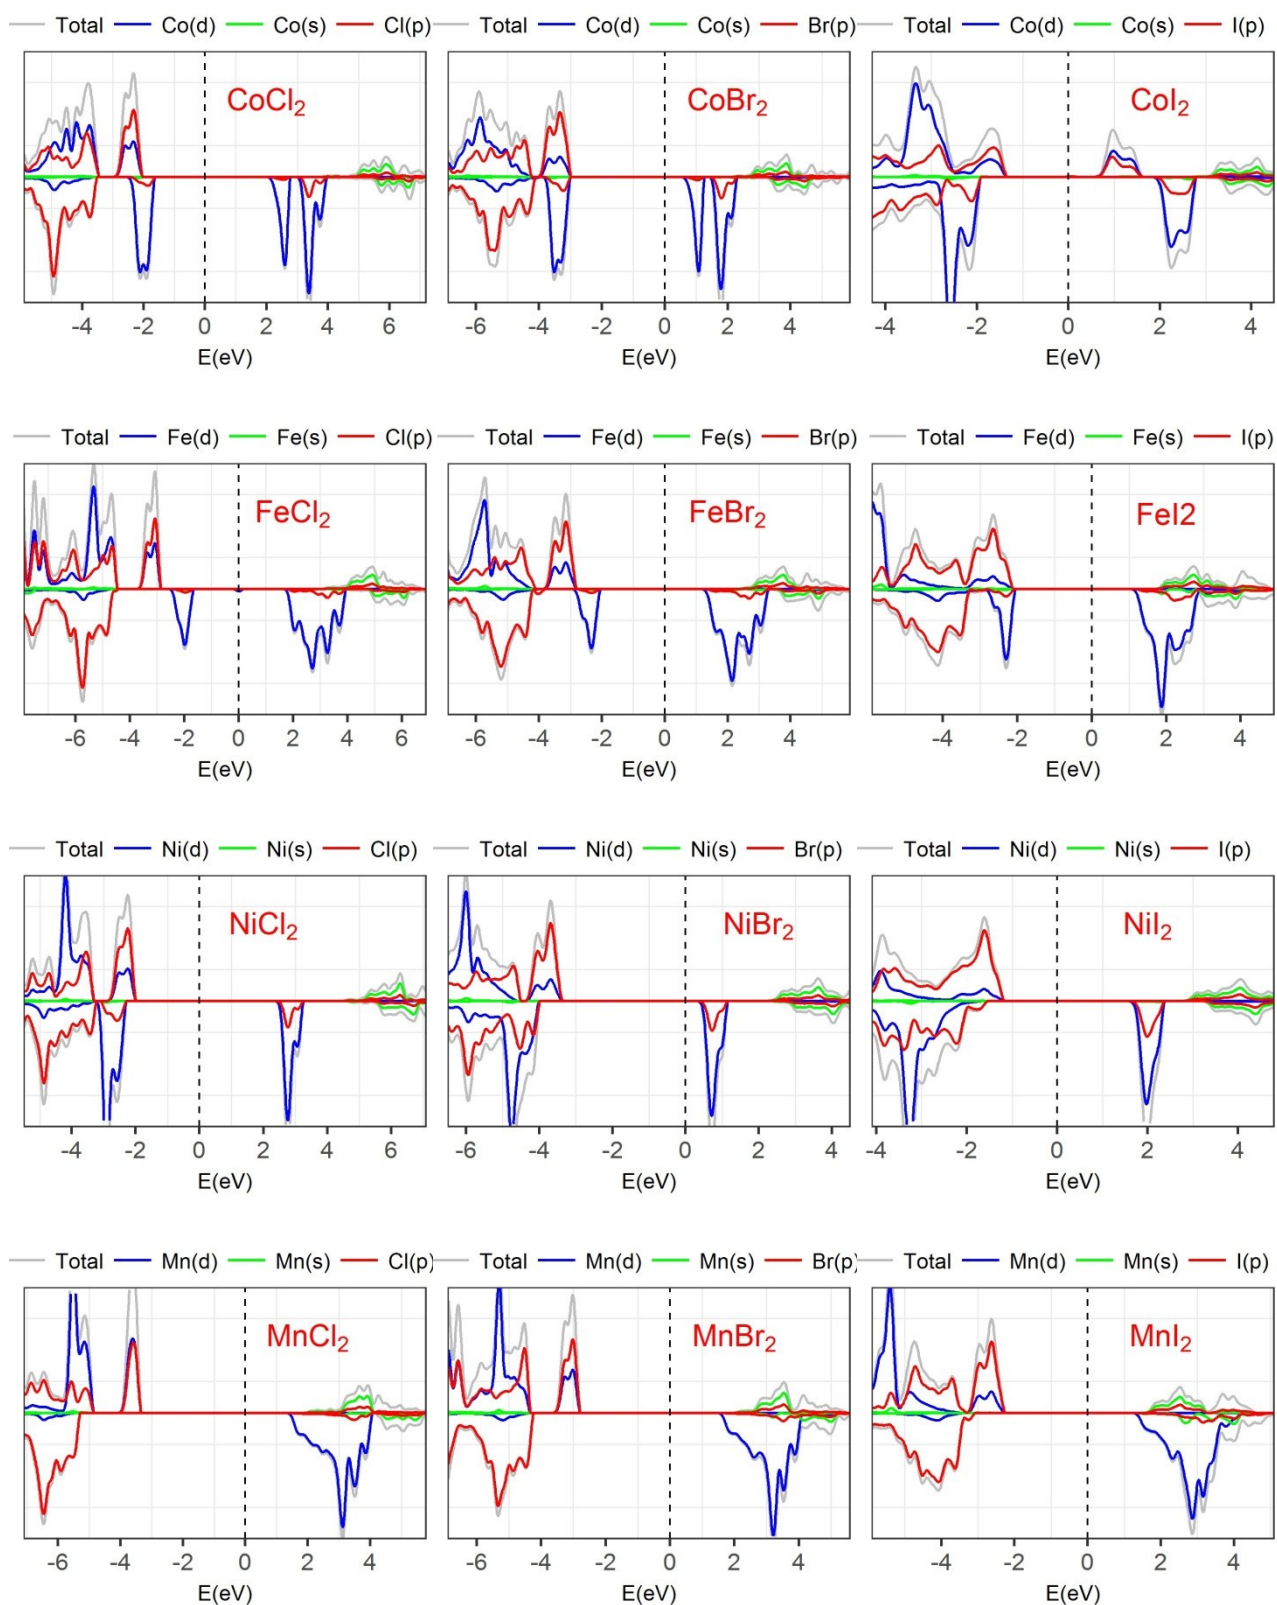

**Figure S2.** Density of states (DOS) of Co, Ni, Fe and Mn-based single-layer dihalides calculated using the HSE functional

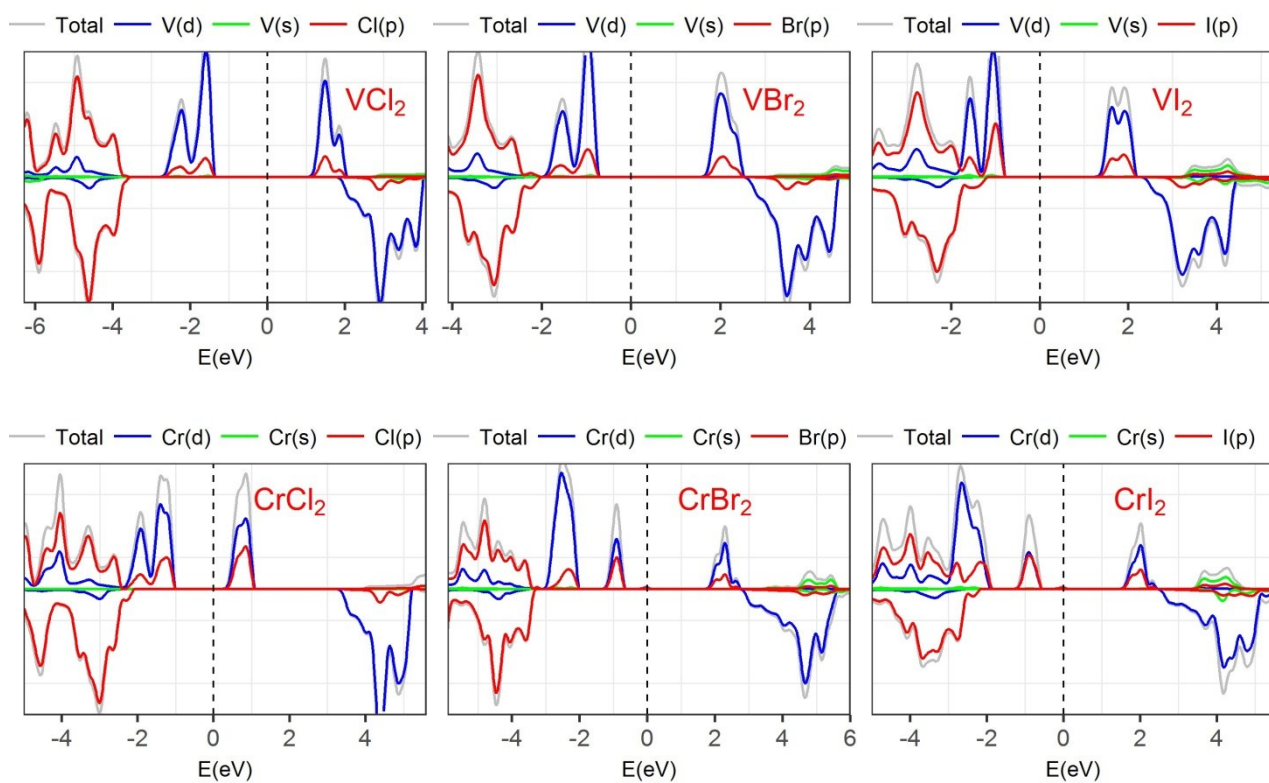

**Figure S3.** Density of states (DOS) of V and Cr-based single-layer dihalides calculated using the HSE functional
